# Supplementary material for: Resistome Diversity and Dissemination of WHO Priority Antibiotic Resistant Pathogens in Lebanese Estuaries
Source: MDPI journal article supplement (doi:10.3390/antibiotics11030306), 2022-02-24
Supplement: s1 [file s1]

**Supplementary Table S1.** The exact coordinates of the sampling locations and the temperature recorded at the time of sampling

| <b>River</b>  | <b>Coordonnates of the sampling locations</b> | <b>Temperatures in april 2017 in °C</b> | <b>Tempratures in january 2018 in °C</b> |
|---------------|-----------------------------------------------|-----------------------------------------|------------------------------------------|
| Janoubi Kabir | 34° 38' 04'' N<br>35° 58' 42'' E              | 19                                      | 13                                       |
| Ostuène       | 34° 36' 07'' N<br>35° 59' 24'' E              | 19                                      | 13                                       |
| Aarqa         | 34° 32' 58'' N<br>35° 59' 30'' E              | 19                                      | 13                                       |
| Al Bared      | 34° 30' 31'' N<br>35° 57' 42'' E              | 18                                      | 12                                       |
| Qadicha       | 34° 26' 48'' N<br>35° 50' 47'' E              | 20                                      | 12                                       |
| Ibrahim       | 34° 03' 54'' N<br>35° 38' 35'' E              | 20                                      | 13                                       |
| Al Kaleb      | 33° 55' 61'' N<br>35° 58' 80'' E              | 19                                      | 13                                       |
| Beyrouth      | 33° 54' 06'' N<br>35° 32' 18'' E              | 19                                      | 14                                       |
| Damour        | 33° 42' 17'' N<br>35° 26' 36'' E              | 18                                      | 15                                       |
| Al Awali      | 33° 35' 20'' N<br>35° 23' 12'' E              | 20                                      | 15                                       |
| Zahrani       | 33° 29' 33'' N<br>35° 20' 34'' E              | 18                                      | 14                                       |
| Litani        | 33° 55' 61'' N<br>35° 59' 80'' E              | 19                                      | 15                                       |

**Supplementary Table S2.** Significant variations ( $p < 0.05$ ) of ARGs families in the rivers between spring and winter

|                   | <i>Significant increase</i><br>( <i>p</i> value)                                                                                                                                                                            | <i>Significant decrease</i><br>( <i>p</i> value)                               |
|-------------------|-----------------------------------------------------------------------------------------------------------------------------------------------------------------------------------------------------------------------------|--------------------------------------------------------------------------------|
| Macrolides        | Awali ( <i>p</i> 0.028)<br>Bared ( <i>p</i> 0.018)<br>Ostuene ( <i>p</i> 0.043)<br>Beirut ( <i>p</i> 0.018)<br>Kaleb ( <i>p</i> 0.012)<br>Zahrani ( <i>p</i> 0.018)                                                         | Qadicha ( <i>p</i> 0.036)                                                      |
| Aminoglycosides   | Awali ( <i>p</i> 0.002)<br>Bared ( <i>p</i> 0.016)<br>Ostuene ( <i>p</i> 0.002)<br>Beirut ( <i>p</i> 0.002)<br>Kaleb ( <i>p</i> 0.001)<br>Aarqa ( <i>p</i> 0.01)<br>Janoubi ( <i>p</i> 0.023)<br>Zahrani ( <i>p</i> 0.001)  | Qadicha ( <i>p</i> 0.03)                                                       |
| Tetracyclines     | Awali ( <i>p</i> 0.043)<br>Bared ( <i>p</i> 0.043)<br>Ostuene ( <i>p</i> 0.043)<br>Beirut ( <i>p</i> 0.043)<br>Kaleb ( <i>p</i> 0.043)<br>Janoubi ( <i>p</i> 0.043)<br>Aarqa ( <i>p</i> 0.043)<br>Zahrani ( <i>p</i> 0.043) | Qadicha ( <i>p</i> 0.043)<br>Damour ( <i>p</i> 0.043)                          |
| β-Lactamase       | Awali ( <i>p</i> 0.03)<br>Bared ( <i>p</i> 0.018)<br>Beirut ( <i>p</i> 0.002)<br>Kaleb ( <i>p</i> 0.011)<br>Aarqa ( <i>p</i> 0.02)<br>Janoubi ( <i>p</i> 0.004)                                                             | Qadicha ( <i>p</i> 0)<br>Damour ( <i>p</i> 0.025)<br>Zahrani ( <i>p</i> 0.012) |
| Heavy metals      | Beirut ( <i>p</i> 0.028)<br>Kaleb ( <i>p</i> 0.046)                                                                                                                                                                         |                                                                                |
| MGEs              | Aarqa ( <i>p</i> 0.07)<br>Bared ( <i>p</i> 0.021)<br>Ostuene ( <i>p</i> 0.005)<br>Janoubi ( <i>p</i> 0.021)<br>Zahrani ( <i>p</i> 0.038)                                                                                    | Qadicha ( <i>p</i> 0.017)                                                      |
| Multi-drug efflux | Awali ( <i>p</i> 0.043)<br>Bared ( <i>p</i> 0.043)<br>Ostuene ( <i>p</i> 0.043)<br>Kaleb ( <i>p</i> 0.043)<br>Aarqa ( <i>p</i> 0.043)<br>Zahrani ( <i>p</i> 0.043)                                                          | Qadicha ( <i>p</i> 0.043)                                                      |
